# Supplementary material for: Individual history of winning and hierarchy landscape influence stress susceptibility in mice
Source: eLife. 2021 Sep 28;10:e71401. doi: 10.7554/eLife.71401 (PMC8497051; doi:10.7554/eLife.71401)
Supplement: Figure 1—source data 1. [file elife-71401-fig1-data1.xlsx]

## Sheet: Sheet1
	Male	Female
	6	-6
	6	-6
	6	-6
	6	-6
	6	-6
	6	-6
	6	-6
	-2	-5
	2	-4.66667
	-1	-4
	-1.33333	-3.33333
	0	-2
	0	-2
	1	-2
	-1	-1
	1	-1
	-1	-0.666667
	-2	-0.666667
	0	0
	-1	0.666667
	1	0.666667
	-6	1
	-3.66667	1
	-6	1
	-6	2
	-6	2
	-4	2
	-6	3
	6	3.33333
	4	3.33333
	5	3.33333
	6	3.33333
	6	3.33333
	6	4.66667
	4	4.66667
	4	5
	5	6
	6	6
	6	6
	-2	6
	1	-6
	-1	-6
	2	-6
	-2	-6
	2	-6
	-2	-6
	2	-6
	1	-6
	-1	-2
	-2	-2
	2	-2
	1	-2
	0	-2
	-0.666667	-2
	0.666667	-2
	-2	-2
	-1	-2
	-5	-2
	-5	-2
	-5	-2
	-6	-2
	-6	-2
	-6	2
	-5	2
	-3	2
	-6	2
	-6	2
	-3	2
	5	2
	-6	2
	0	6
	1	6
	-5	6
	4	6
	0	6
	1	6
	-3	6
	-3	6
	3	6
	3	6
	-6
	-2
	6
	2
	-6
	2
	-2
	6
	-1
	5
	1
	-5
	0
	0
	6
	-6
	-3
	-1
	2
	2
	-3.33333
	2
	-3.33333
	4.66667
	1
	-6
	5
	0
	-4
	-2
	0
	6
	1
	-4
	6
	-3
	0
	-5
	-1
	6
	-5
	-1
	6
	0
	-4
	-1
	6
	-1
	-2
	5
	-1
	-2
	-6
	0
	6
	0
	0
	0
	6
	-6
	2
	4.66667
	-0.666667
	-6
	2
	-4.66667
	-3.33333
	6
	4
	6
	3.66667
	6
	5
	0
	2
	0
	0
	-0.666667
	0
	0
	-2
	1
	-1
	-6
	-6
	-3
	-4
	-5
	6
	6
	4
	6
	4.66667
	6
	2
	-2
	-2
	-2
	-2
	-1
	2
	2
	-2
	-6
	-2
	-1
	1
	-6
	-5
	-6
	3.33333
	-6
	-2
	4
	3
	-5
	-6
	1
	6
	-1
	5
	2
	-1
	-6
	5.75
	-5.25
	-0.25
	-2.25
	-3.33333
	-4.66667
	6
	2
	-2
	-2
	6
	-2
	6
	2
	-2
	-6
	1
	6
	-1
	-6
	-6
	0
	0
	6
	6
	-2
	2
	-6
