# Supplementary material for: Individual history of winning and hierarchy landscape influence stress susceptibility in mice
Source: eLife. 2021 Sep 28;10:e71401. doi: 10.7554/eLife.71401 (PMC8497051; doi:10.7554/eLife.71401)
Supplement: Figure 2—figure supplement 1—source data 1. [file elife-71401-fig2-figsupp1-data1.xlsx]

## Sheet: Male Defeat
Defeat Day	DOM
1	9	16	23	44	21
5	19	9	16	5	16
10	20	19	11	9	1	25	20	19	11	9	6	14	4	17
	SUB
1	16	23	13	38	6
5	10	12	9	19	13	11	18	6
10	16	18	13	11	17	1	27	7	18	16	18	13	11	1	27

## Sheet: Female defeat
Defeat Day	DOM
1	13	27	9	2	15
6	6	9	14	11
10	4	8	18	15	8	2
	SUB
1	8	27	3	10	32	12
6	5	14	10	25	12	1
10	5	1	6	6	4	6	12	17	28

## Sheet: Inter-Female Defeat
Defeat Day	DOM
1	5	9	31	14	26	20	30
6	28	13	20	14	10
10	15	5	8	6	6
	SUB
1	2	18	23	43	16	19	35	44	22	26
6	9	33	20	12	14
10	6	8	9	12	6
												O
